# Supplementary figures and images for: Deep learning-based classification of retinal vascular diseases using ultra-widefield colour fundus photographs
Source: HighWire-hosted journal article supplement (doi:10.1136/bmjophth-2021-000924), 2022-02-01

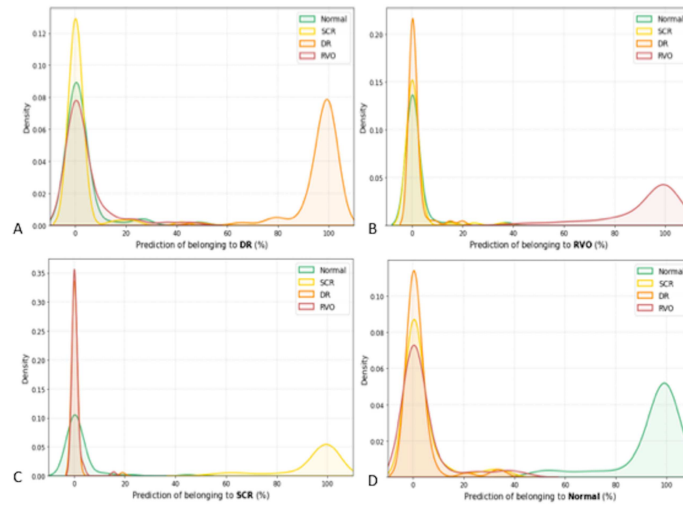

Supplement: bmjophth-2021-000924supp003_data_supplement.pdf [file bmjophth-2021-000924supp003_data_supplement.pdf]
